# Supplementary material for: The Google Earth Engine Digitisation Tool (GEEDiT) and the Margin change Quantification Tool (MaQiT) – simple tools for the rapid mapping and quantification of changing Earth surface margins
Source: Copernicus journal article supplement (doi:10.5194/esurf-6-551-2018), 2018-07-13
Supplement: Supplementary file 1 [file esurf-6-551-2018-supplement.zip]

Archive with 9 entries (9 files):
- Supplementary.zip
- Breida_L8_S2.shx
- Breida_L8_S2.shp
- Breida_L8_S2.dbf
- esurf-6-551-2018-supplement-title-page.pdf
- Breida_centreline.shx
- Breida_centreline.dbf
- Breida_centreline.shp
- Supplementary_Readme.pdf
