# Supplementary material for: The Google Earth Engine Digitisation Tool (GEEDiT) and the Margin change Quantification Tool (MaQiT) – simple tools for the rapid mapping and quantification of changing Earth surface margins
Source: Copernicus journal article supplement (doi:10.5194/esurf-6-551-2018), 2018-07-13
Supplement: Supplementary file 1 [file esurf-6-551-2018-supplement.zip › esurf-6-551-2018-supplement-title-page.pdf]

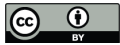

## *Supplement of*

# **The Google Earth Engine Digitisation Tool (GEEDiT) and the Margin change Quantification Tool (MaQiT) – simple tools for the rapid mapping and quantification of changing Earth surface margins**

**James M. Lea**

*Correspondence to:* James M. Lea ([j.lea@liverpool.ac.uk](mailto:j.lea@liverpool.ac.uk))

- [esurf-6-551-2018-supplement-title-page.pdf](#)
- [Breida\\_L8\\_S2.dbf](#)
- [Breida\\_L8\\_S2.shp](#)
- [Breida\\_L8\\_S2.shx](#)
- [Breida\\_centreline.dbf](#)
- [Breida\\_centreline.shp](#)
- [Breida\\_centreline.shx](#)
- [Supplementary.zip](#)
- [Supplementary\\_Readme.pdf](#)

The copyright of individual parts of the supplement might differ from the CC BY 4.0 License.
